# Supplementary material for: Age-related changes in functional connectivity between young adulthood and late adulthood
Source: Royal Society of Chemistry journal article supplement (doi:10.1039/c5ay00699f), 2015-01-01
Supplement: c5ay00699f1.pdf [file c5ay00699f1.pdf]

**Figure S1. The correlation strength of all the AAL regions throughout the participants.**

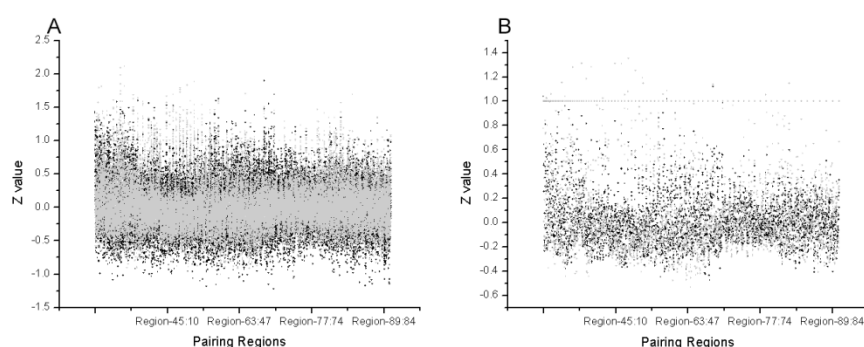

The correlation coefficient pattern as derived from the correlation matrixes was drawn for each participant. The Y-axis represents the correlation coefficient (Z value) of pairing regions (X-axis), ordered from PreCG.L, PreCG.R (label 1, label2 in Table S3) to ITG.L, ITG.R (label 89, label90 in Table S3). The grey points represent young adulthood and the black points represent late adulthood. **A-** All the correlation coefficients were included. **B-** The mean correlation coefficient pattern was included in young adulthood and late adulthood. Intuitively, the correlation coefficient of pairing regions was generally higher in young adulthood. This supports the results in figure 1.

**Figure S2. Comparison of the correlation between a node's degree and its direct neighbors.**

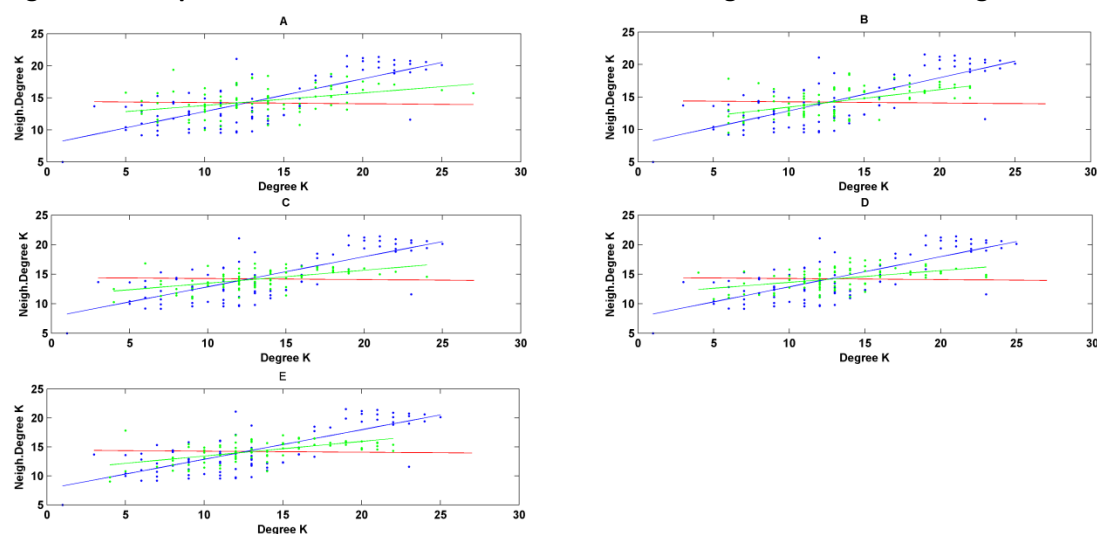

As in figure 3, we applied the same methods to the five other young adulthood groups (A: Leiden Part2, B: Zang Part1, C: Zang Part2, D: Zang Part3, E: Zang Part5). Their coefficient (C) and R2 are 0.19 and 1.57 for A, 0.27 and 0.30 for B, 0.22 and 0.30 for C, 0.20 and 0.22 for D, 0.25 and 0.31 for E, respectively, compared with 0.51 and 0.57, respectively, from Munchen. The results showed the same trend as in figure 3.

**Figure S3. Connectivity density within anatomically distinct brain areas throughout all the groups.**

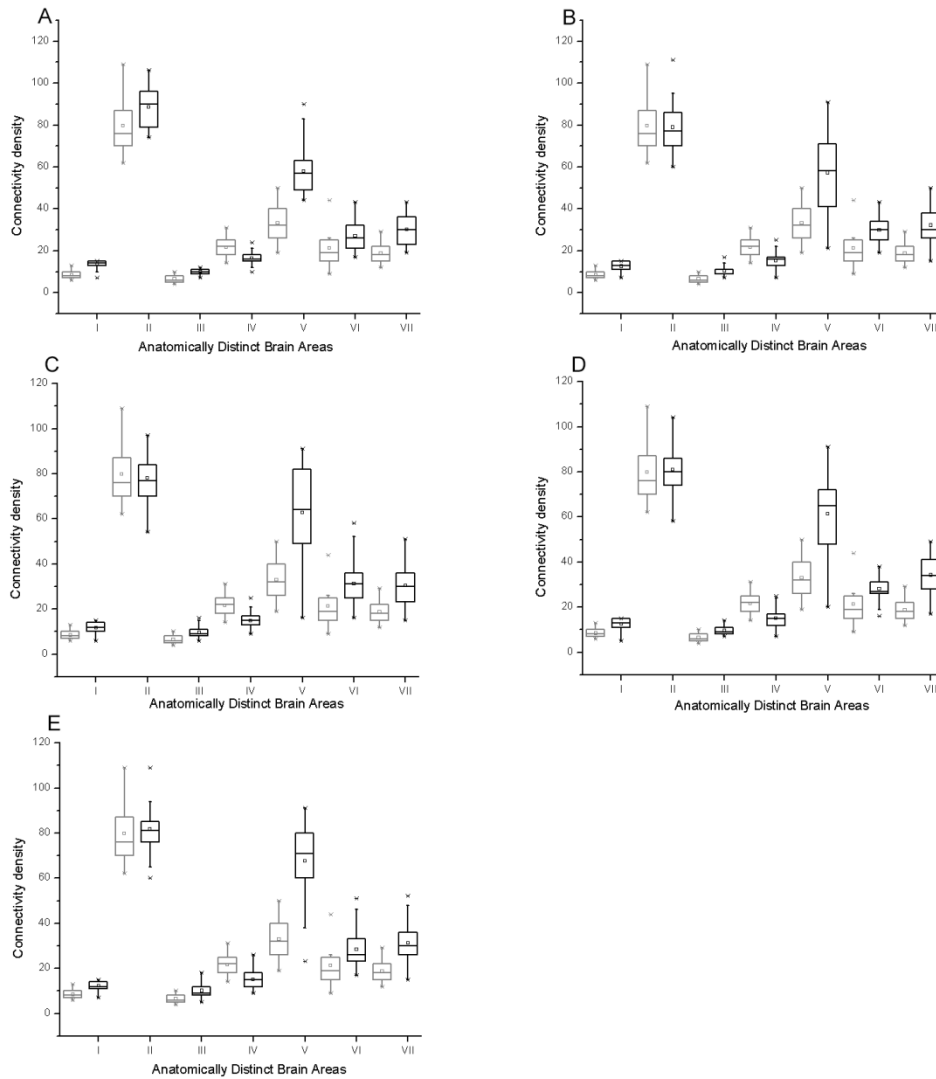

To confirm the results in figure 5, we examined the connectivity density by using the other five datasets. The results showed that the connectivity of the central regions, the temporal lobe, the parietal lobe, the occipital lobe, and the insula/sub cortical gray nuclei were almost the same as in figure 5, but that they presented a significant difference ( $P < 0.01$ ) between young adulthood and late adulthood (See Table S2).

**Figure S4. Connectivity strength within anatomically distinct brain areas throughout all groups.**

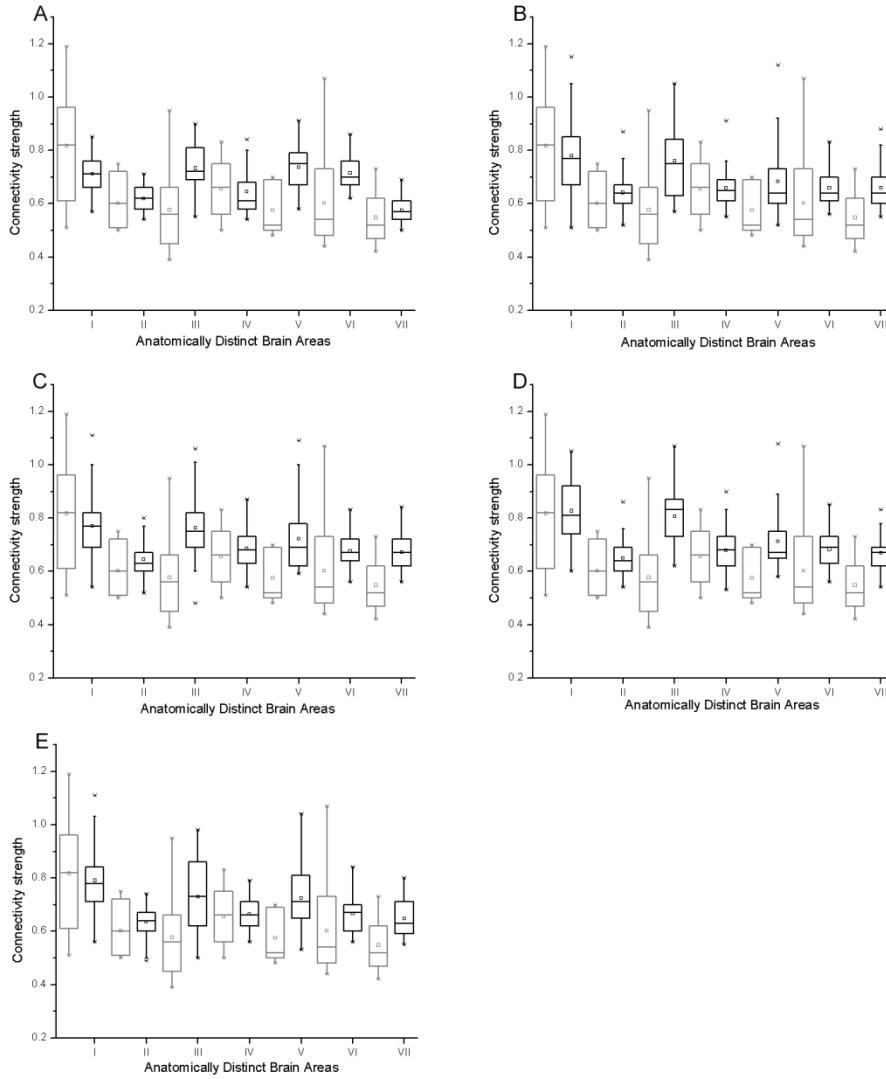

To confirm the results in figure 5, we examined the connectivity strength using the other five datasets. The results showed that the temporal lobe and occipital lobe present a significant difference between young adulthood and late adulthood (See Table S2).

**Table S1. The data used for mapping the network with the BrainNet Viewer.**

|        |               |                                            |              |          | volume-<br>based ROI |          |        | volume-<br>based<br>ROI |       |
|--------|---------------|--------------------------------------------|--------------|----------|----------------------|----------|--------|-------------------------|-------|
| Labels | Regions       | Regions                                    | abbr.        | x(voxel) | y(voxel)             | z(voxel) | x(mm)  | y(mm)                   | z(mm) |
| 1      | Precentral_L  | Precentral<br>gyrus                        | PreCG.L      | 51       | 120                  | 123      | -38.65 | -5.68                   | 50.94 |
| 2      | Precentral_R  | Precentral<br>gyrus                        | PreCG.R      | 131      | 118                  | 124      | 41.37  | -8.21                   | 52.09 |
| 3      | Frontal_Sup_L | Superior<br>frontal gyrus,<br>dorsolateral | SFGdor.<br>L | 72       | 161                  | 114      | -18.45 | 34.81                   | 42.2  |

|    |                    |                                         |              |     |     |     |        |       |        |
|----|--------------------|-----------------------------------------|--------------|-----|-----|-----|--------|-------|--------|
| 4  | Frontal_Sup_R      | Superior frontal gyrus, dorsolateral    | SFGdor. R    | 112 | 157 | 116 | 21.9   | 31.12 | 43.82  |
| 5  | Frontal_Sup_Orb_L  | Superior frontal gyrus, orbital part    | ORBsup. L    | 73  | 173 | 59  | -16.56 | 47.32 | -13.31 |
| 6  | Frontal_Sup_Orb_R  | Superior frontal gyrus, orbital part    | ORBsup. R    | 108 | 174 | 58  | 18.49  | 48.1  | -14.02 |
| 7  | Frontal_Mid_L      | Middle frontal gyrus                    | MFG.L        | 57  | 159 | 107 | -33.43 | 32.73 | 35.46  |
| 8  | Frontal_Mid_R      | Middle frontal gyrus                    | MFG.R        | 128 | 159 | 106 | 37.59  | 33.06 | 34.04  |
| 9  | Frontal_Mid_Orb_L  | Middle frontal gyrus, orbital part      | ORBmid .L    | 59  | 176 | 62  | -30.65 | 50.43 | -9.62  |
| 10 | Frontal_Mid_Orb_R  | Middle frontal gyrus, orbital part      | ORBmid .R    | 123 | 179 | 61  | 33.18  | 52.59 | -10.73 |
| 11 | Frontal_Inf_Oper_L | Inferior frontal gyrus, opercular part  | IFGoper c.L  | 42  | 139 | 91  | -48.43 | 12.73 | 19.02  |
| 12 | Frontal_Inf_Oper_R | Inferior frontal gyrus, opercular part  | IFGoper c.R  | 140 | 141 | 93  | 50.2   | 14.98 | 21.41  |
| 13 | Frontal_Inf_Tri_L  | Inferior frontal gyrus, triangular part | IFGtrian g.L | 44  | 156 | 86  | -45.58 | 29.91 | 13.99  |
| 14 | Frontal_Inf_Tri_R  | Inferior frontal gyrus, triangular part | IFGtrian g.R | 140 | 156 | 86  | 50.33  | 30.16 | 14.17  |
| 15 | Frontal_Inf_Orb_L  | Inferior frontal gyrus, orbital part    | ORBinf. L    | 54  | 157 | 60  | -35.98 | 30.71 | -12.11 |
| 16 | Frontal_Inf_Orb_R  | Inferior frontal gyrus, orbital part    | ORBinf. R    | 131 | 158 | 60  | 41.22  | 32.23 | -11.91 |
| 17 | Rolandic_Oper_L    | Rolandic operculum                      | ROL.L        | 43  | 118 | 86  | -47.16 | -8.48 | 13.95  |
| 18 | Rolandic_Oper_R    | Rolandic operculum                      | ROL.R        | 143 | 120 | 87  | 52.65  | -6.25 | 14.63  |
| 19 | Supp_Motor_Area_L  | Supplementary motor area                | SMA.L        | 85  | 131 | 133 | -5.32  | 4.85  | 61.38  |
| 20 | Supp_Motor_Area    | Supplementary motor area                | SMA.R        | 99  | 126 | 134 | 8.62   | 0.17  | 61.85  |

|    |                      |                                           |              |     |     |     |        |        |        |
|----|----------------------|-------------------------------------------|--------------|-----|-----|-----|--------|--------|--------|
|    | _R                   | y motor area                              |              |     |     |     |        |        |        |
| 21 | Olfactory_L          | Olfactory cortex                          | OLF.L        | 82  | 141 | 61  | -8.06  | 15.05  | -11.46 |
| 22 | Olfactory_R          | Olfactory cortex                          | OLF.R        | 100 | 142 | 61  | 10.43  | 15.91  | -11.26 |
| 23 | Frontal_Sup_Medial_L | Superior frontal gyrus, medial            | SFGmed.L     | 85  | 175 | 103 | -4.8   | 49.17  | 30.89  |
| 24 | Frontal_Sup_Medial_R | Superior frontal gyrus, medial            | SFGmed.R     | 99  | 177 | 102 | 9.1    | 50.84  | 30.22  |
| 25 | Frontal_Mid_Orb_L    | Superior frontal gyrus, medial orbital    | ORBsup med.L | 85  | 180 | 65  | -5.17  | 54.06  | -7.4   |
| 26 | Frontal_Mid_Orb_R    | Superior frontal gyrus, medial orbital    | ORBsup med.R | 98  | 178 | 65  | 8.16   | 51.67  | -7.13  |
| 27 | Rectus_L             | Gyrus rectus                              | REC.L        | 85  | 163 | 54  | -5.08  | 37.07  | -18.14 |
| 28 | Rectus_R             | Gyrus rectus                              | REC.R        | 98  | 162 | 54  | 8.35   | 35.64  | -18.04 |
| 29 | Insula_L             | Insula                                    | INS.L        | 55  | 133 | 75  | -35.13 | 6.65   | 3.44   |
| 30 | Insula_R             | Insula                                    | INS.R        | 129 | 132 | 74  | 39.02  | 6.25   | 2.08   |
| 31 | Cingulum_Ant_L       | Anterior cingulate and paracingulate gyri | ACG.L        | 86  | 161 | 86  | -4.04  | 35.4   | 13.95  |
| 32 | Cingulum_Ant_R       | Anterior cingulate and paracingulate gyri | ACG.R        | 98  | 163 | 88  | 8.46   | 37.01  | 15.84  |
| 33 | Cingulum_Mid_L       | Median cingulate and paracingulate gyri   | DCG.L        | 85  | 111 | 114 | -5.48  | -14.92 | 41.57  |
| 34 | Cingulum_Mid_R       | Median cingulate and paracingulate gyri   | DCG.R        | 98  | 117 | 112 | 8.02   | -8.83  | 39.79  |
| 35 | Cingulum_Post_L      | Posterior cingulate gyrus                 | PCG.L        | 85  | 83  | 97  | -4.85  | -42.92 | 24.67  |
| 36 | Cingulum_Post_R      | Posterior cingulate gyrus                 | PCG.R        | 97  | 84  | 94  | 7.44   | -41.81 | 21.87  |
| 37 | Hippocampus_L        | Hippocampus                               | HIP.L        | 65  | 105 | 62  | -25.03 | -20.74 | -10.13 |

|    |                   |                                          |        |     |     |     |        |        |        |
|----|-------------------|------------------------------------------|--------|-----|-----|-----|--------|--------|--------|
| 38 | Hippocampus_R     | Hippocampus                              | HIP.R  | 119 | 106 | 62  | 29.23  | -19.78 | -10.33 |
| 39 | ParaHippocampal_L | Parahippocampal gyrus                    | PHG.L  | 69  | 110 | 51  | -21.17 | -15.95 | -20.7  |
| 40 | ParaHippocampal_R | Parahippocampal gyrus                    | PHG.R  | 115 | 111 | 52  | 25.38  | -15.15 | -20.47 |
| 41 | Amygdala_L        | Amygdala                                 | AMYG.L | 67  | 125 | 55  | -23.27 | -0.67  | -17.14 |
| 42 | Amygdala_R        | Amygdala                                 | AMYG.R | 117 | 127 | 54  | 27.32  | 0.64   | -17.5  |
| 43 | Calcarine_L       | Calcarine fissure and surrounding cortex | CAL.L  | 83  | 47  | 78  | -7.14  | -78.67 | 6.44   |
| 44 | Calcarine_R       | Calcarine fissure and surrounding cortex | CAL.R  | 106 | 53  | 81  | 15.99  | -73.15 | 9.4    |
| 45 | Cuneus_L          | Cuneus                                   | CUN.L  | 84  | 46  | 99  | -5.93  | -80.13 | 27.22  |
| 46 | Cuneus_R          | Cuneus                                   | CUN.R  | 104 | 47  | 100 | 13.51  | -79.36 | 28.23  |
| 47 | Lingual_L         | Lingual gyrus                            | LING.L | 75  | 58  | 67  | -14.62 | -67.56 | -4.63  |
| 48 | Lingual_R         | Lingual gyrus                            | LING.R | 106 | 59  | 68  | 16.29  | -66.93 | -3.87  |
| 49 | Occipital_Sup_L   | Superior occipital gyrus                 | SOG.L  | 73  | 42  | 100 | -16.54 | -84.26 | 28.17  |
| 50 | Occipital_Sup_R   | Superior occipital gyrus                 | SOG.R  | 114 | 45  | 103 | 24.29  | -80.85 | 30.59  |
| 51 | Occipital_Mid_L   | Middle occipital gyrus                   | MOG.L  | 58  | 45  | 88  | -32.39 | -80.73 | 16.11  |
| 52 | Occipital_Mid_R   | Middle occipital gyrus                   | MOG.R  | 127 | 46  | 91  | 37.39  | -79.7  | 19.42  |
| 53 | Occipital_Inf_L   | Inferior occipital gyrus                 | IOG.L  | 54  | 48  | 64  | -36.36 | -78.29 | -7.84  |
| 54 | Occipital_Inf_R   | Inferior occipital gyrus                 | IOG.R  | 128 | 44  | 64  | 38.16  | -81.99 | -7.61  |
| 55 | Fusiform_L        | Fusiform gyrus                           | FFG.L  | 59  | 86  | 52  | -31.16 | -40.3  | -20.23 |
| 56 | Fusiform_R        | Fusiform gyrus                           | FFG.R  | 124 | 87  | 52  | 33.97  | -39.1  | -20.18 |
| 57 | Postcentral_L     | Postcentral gyrus                        | PoCG.L | 48  | 103 | 121 | -42.46 | -22.63 | 48.92  |
| 58 | Postcentral_R     | Postcentral gyrus                        | PoCG.R | 131 | 101 | 125 | 41.43  | -25.49 | 52.55  |
| 59 | Parietal_Sup_L    | Superior parietal gyrus                  | SPG.L  | 67  | 66  | 131 | -23.45 | -59.56 | 58.96  |
| 60 | Parietal_Sup_R    | Superior parietal gyrus                  | SPG.R  | 116 | 67  | 134 | 26.11  | -59.18 | 62.06  |

|    |                      |                                                       |        |     |     |     |        |        |       |
|----|----------------------|-------------------------------------------------------|--------|-----|-----|-----|--------|--------|-------|
| 61 | Parietal_Inf_L       | Inferior parietal, but supramarginal and angular gyri | IPL.L  | 47  | 80  | 119 | -42.8  | -45.82 | 46.74 |
| 62 | Parietal_Inf_R       | Inferior parietal, but supramarginal and angular gyri | IPL.R  | 136 | 80  | 122 | 46.46  | -46.29 | 49.54 |
| 63 | SupraMarginal_L      | Supramarginal gyrus                                   | SMG.L  | 34  | 92  | 102 | -55.79 | -33.64 | 30.45 |
| 64 | SupraMarginal_R      | Supramarginal gyrus                                   | SMG.R  | 148 | 94  | 106 | 57.61  | -31.5  | 34.48 |
| 65 | Angular_L            | Angular gyrus                                         | ANG.L  | 46  | 65  | 108 | -44.14 | -60.82 | 35.59 |
| 66 | Angular_R            | Angular gyrus                                         | ANG.R  | 136 | 66  | 111 | 45.51  | -59.98 | 38.63 |
| 67 | Precuneus_L          | Precuneus                                             | PCUN.L | 83  | 70  | 120 | -7.24  | -56.07 | 48.01 |
| 68 | Precuneus_R          | Precuneus                                             | PCUN.R | 100 | 70  | 116 | 9.98   | -56.05 | 43.77 |
| 69 | Paracentral_Lobule_L | Paracentral lobule                                    | PCL.L  | 82  | 101 | 142 | -7.63  | -25.36 | 70.07 |
| 70 | Paracentral_Lobule_R | Paracentral lobule                                    | PCL.R  | 97  | 94  | 140 | 7.48   | -31.59 | 68.09 |
| 71 | Caudate_L            | Caudate nucleus                                       | CAU.L  | 79  | 137 | 81  | -11.46 | 11     | 9.24  |
| 72 | Caudate_R            | Caudate nucleus                                       | CAU.R  | 105 | 138 | 81  | 14.84  | 12.07  | 9.42  |
| 73 | Putamen_L            | Lenticular nucleus, putamen                           | PUT.L  | 66  | 130 | 74  | -23.91 | 3.86   | 2.4   |
| 74 | Putamen_R            | Lenticular nucleus, putamen                           | PUT.R  | 118 | 131 | 74  | 27.78  | 4.91   | 2.46  |
| 75 | Pallidum_L           | Lenticular nucleus, pallidum                          | PAL.L  | 72  | 126 | 72  | -17.75 | -0.03  | 0.21  |
| 76 | Pallidum_R           | Lenticular nucleus, pallidum                          | PAL.R  | 111 | 126 | 72  | 21.2   | 0.18   | 0.23  |
| 77 | Thalamus_L           | Thalamus                                              | THA.L  | 79  | 108 | 80  | -10.85 | -17.56 | 7.98  |
| 78 | Thalamus_R           | Thalamus                                              | THA.R  | 103 | 108 | 80  | 13     | -17.55 | 8.09  |
| 79 | Heschl_L             | Heschl gyrus                                          | HES.L  | 48  | 107 | 82  | -41.99 | -18.88 | 9.98  |
| 80 | Heschl_R             | Heschl gyrus                                          | HES.R  | 136 | 109 | 82  | 45.86  | -17.15 | 10.41 |
| 81 | Temporal_Sup_L       | Superior temporal                                     | STG.L  | 37  | 105 | 79  | -53.16 | -20.68 | 7.13  |

|    |                     |                                        |           |     |     |    |        |        |        |
|----|---------------------|----------------------------------------|-----------|-----|-----|----|--------|--------|--------|
|    |                     | gyrus                                  |           |     |     |    |        |        |        |
| 82 | Temporal_Sup_R      | Superior temporal gyrus                | STG.R     | 148 | 104 | 79 | 58.15  | -21.78 | 6.8    |
| 83 | Temporal_Pole_Sup_L | Temporal pole: superior temporal gyrus | TPOsup. L | 50  | 141 | 52 | -39.88 | 15.14  | -20.18 |
| 84 | Temporal_Pole_Sup_R | Temporal pole: superior temporal gyrus | TPOsup. R | 138 | 141 | 55 | 48.25  | 14.75  | -16.86 |
| 85 | Temporal_Mid_L      | Middle temporal gyrus                  | MTG.L     | 34  | 92  | 70 | -55.52 | -33.8  | -2.2   |
| 86 | Temporal_Mid_R      | Middle temporal gyrus                  | MTG.R     | 147 | 89  | 71 | 57.47  | -37.23 | -1.47  |
| 87 | Temporal_Pole_Mid_L | Temporal pole: middle temporal gyrus   | TPOmid. L | 54  | 141 | 38 | -36.32 | 14.59  | -34.08 |
| 88 | Temporal_Pole_Mid_R | Temporal pole: middle temporal gyrus   | TPOmid. R | 134 | 141 | 40 | 44.22  | 14.55  | -32.23 |
| 89 | Temporal_Inf_L      | Inferior temporal gyrus                | ITG.L     | 40  | 98  | 49 | -49.77 | -28.05 | -23.17 |
| 90 | Temporal_Inf_R      | Inferior temporal gyrus                | ITG.R     | 144 | 95  | 50 | 53.69  | -31.07 | -22.32 |

In this table, (A for Munchen, B for Leiden Part1), Columns 1-3 represent the node coordinates, column 4 represents the node location, column 5 represents the nodal degree, and the last column represents the node label.

**Table S2. Functional connectivity within anatomically distinct brain areas with the five other groups.**

|                        |       |        |   |      |          |
|------------------------|-------|--------|---|------|----------|
| For the late adulthood |       |        |   |      |          |
| -38.65                 | -5.68 | 50.94  | 1 | 5.75 | PreCG.L  |
| 41.37                  | -8.21 | 52.09  | 1 | 6.25 | PreCG.R  |
| -18.45                 | 34.81 | 42.2   | 2 | 5.5  | SFGdor.L |
| 21.9                   | 31.12 | 43.82  | 2 | 6    | SFGdor.R |
| -16.56                 | 47.32 | -13.31 | 2 | 2.25 | ORBsup.L |



|        |        |        |   |      |             |
|--------|--------|--------|---|------|-------------|
| 18.49  | 48.1   | -14.02 | 2 | 3    | ORBsup.R    |
| -33.43 | 32.73  | 35.46  | 2 | 5.25 | MFG.L       |
| 37.59  | 33.06  | 34.04  | 2 | 5.25 | MFG.R       |
| -30.65 | 50.43  | -9.62  | 2 | 2    | ORBmid.L    |
| 33.18  | 52.59  | -10.73 | 2 | 1.5  | ORBmid.R    |
| -48.43 | 12.73  | 19.02  | 2 | 4.25 | IFGoperc.L  |
| 50.2   | 14.98  | 21.41  | 2 | 4.5  | IFGoperc.R  |
| -45.58 | 29.91  | 13.99  | 2 | 3.25 | IFGtriang.L |
| 50.33  | 30.16  | 14.17  | 2 | 3    | IFGtriang.R |
| -35.98 | 30.71  | -12.11 | 2 | 2.75 | ORBinf.L    |
| 41.22  | 32.23  | -11.91 | 2 | 1.75 | ORBinf.R    |
| -47.16 | -8.48  | 13.95  | 1 | 2.75 | ROL.L       |
| 52.65  | -6.25  | 14.63  | 1 | 4    | ROL.R       |
| -5.32  | 4.85   | 61.38  | 2 | 5    | SMA.L       |
| 8.62   | 0.17   | 61.85  | 2 | 5.25 | SMA.R       |
| -8.06  | 15.05  | -11.46 | 2 | 3.25 | OLF.L       |
| 10.43  | 15.91  | -11.26 | 2 | 3.25 | OLF.R       |
| -4.8   | 49.17  | 30.89  | 2 | 2.75 | SFGmed.L    |
| 9.1    | 50.84  | 30.22  | 2 | 2.25 | SFGmed.R    |
| -5.17  | 54.06  | -7.4   | 2 | 2.75 | ORBsupmed.L |
| 8.16   | 51.67  | -7.13  | 2 | 3.25 | ORBsupmed.R |
| -5.08  | 37.07  | -18.14 | 2 | 3.5  | REC.L       |
| 8.35   | 35.64  | -18.04 | 2 | 3.75 | REC.R       |
| -35.13 | 6.65   | 3.44   | 7 | 4    | INS.L       |
| 39.02  | 6.25   | 2.08   | 7 | 5.75 | INS.R       |
| -4.04  | 35.4   | 13.95  | 6 | 2.5  | ACG.L       |
| 8.46   | 37.01  | 15.84  | 6 | 3.25 | ACG.R       |
| -5.48  | -14.92 | 41.57  | 6 | 5.5  | DCG.L       |
| 8.02   | -8.83  | 39.79  | 6 | 5    | DCG.R       |
| -4.85  | -42.92 | 24.67  | 6 | 1.5  | PCG.L       |
| 7.44   | -41.81 | 21.87  | 6 | 0.75 | PCG.R       |
| -25.03 | -20.74 | -10.13 | 6 | 3.25 | HIP.L       |
| 29.23  | -19.78 | -10.33 | 6 | 2.5  | HIP.R       |
| -21.17 | -15.95 | -20.7  | 6 | 2.25 | PHG.L       |
| 25.38  | -15.15 | -20.47 | 6 | 2.25 | PHG.R       |
| -23.27 | -0.67  | -17.14 | 7 | 3.75 | AMYG.L      |
| 27.32  | 0.64   | -17.5  | 7 | 1.5  | AMYG.R      |
| -7.14  | -78.67 | 6.44   | 5 | 3    | CAL.L       |
| 15.99  | -73.15 | 9.4    | 5 | 2.75 | CAL.R       |
| -5.93  | -80.13 | 27.22  | 5 | 2.25 | CUN.L       |
| 13.51  | -79.36 | 28.23  | 5 | 2.75 | CUN.R       |
| -14.62 | -67.56 | -4.63  | 5 | 2.25 | LING.L      |
| 16.29  | -66.93 | -3.87  | 5 | 1.75 | LING.R      |

|        |        |        |   |      |          |
|--------|--------|--------|---|------|----------|
| -16.54 | -84.26 | 28.17  | 5 | 3    | SOG.L    |
| 24.29  | -80.85 | 30.59  | 5 | 2    | SOG.R    |
| -32.39 | -80.73 | 16.11  | 5 | 2.25 | MOG.L    |
| 37.39  | -79.7  | 19.42  | 5 | 2.75 | MOG.R    |
| -36.36 | -78.29 | -7.84  | 5 | 1.75 | IOG.L    |
| 38.16  | -81.99 | -7.61  | 5 | 3    | IOG.R    |
| -31.16 | -40.3  | -20.23 | 5 | 2.25 | FFG.L    |
| 33.97  | -39.1  | -20.18 | 5 | 3.25 | FFG.R    |
| -42.46 | -22.63 | 48.92  | 1 | 5.75 | PoCG.L   |
| 41.43  | -25.49 | 52.55  | 1 | 6    | PoCG.R   |
| -23.45 | -59.56 | 58.96  | 4 | 5.5  | SPG.L    |
| 26.11  | -59.18 | 62.06  | 4 | 5.75 | SPG.R    |
| -42.8  | -45.82 | 46.74  | 4 | 5.5  | IPL.L    |
| 46.46  | -46.29 | 49.54  | 4 | 5.5  | IPL.R    |
| -55.79 | -33.64 | 30.45  | 4 | 4.25 | SMG.L    |
| 57.61  | -31.5  | 34.48  | 4 | 5    | SMG.R    |
| -44.14 | -60.82 | 35.59  | 4 | 3    | ANG.L    |
| 45.51  | -59.98 | 38.63  | 4 | 4.75 | ANG.R    |
| -7.24  | -56.07 | 48.01  | 4 | 4    | PCUN.L   |
| 9.98   | -56.05 | 43.77  | 4 | 4.75 | PCUN.R   |
| -7.63  | -25.36 | 70.07  | 2 | 5.5  | PCL.L    |
| 7.48   | -31.59 | 68.09  | 2 | 4.75 | PCL.R    |
| -11.46 | 11     | 9.24   | 7 | 1.25 | CAU.L    |
| 14.84  | 12.07  | 9.42   | 7 | 2.75 | CAU.R    |
| -23.91 | 3.86   | 2.4    | 7 | 4.25 | PUT.L    |
| 27.78  | 4.91   | 2.46   | 7 | 3.25 | PUT.R    |
| -17.75 | -0.03  | 0.21   | 7 | 2.75 | PAL.L    |
| 21.2   | 0.18   | 0.23   | 7 | 1.75 | PAL.R    |
| -10.85 | -17.56 | 7.98   | 7 | 0.25 | THA.L    |
| 13     | -17.55 | 8.09   | 7 | 1.25 | THA.R    |
| -41.99 | -18.88 | 9.98   | 3 | 2    | HES.L    |
| 45.86  | -17.15 | 10.41  | 3 | 1.75 | HES.R    |
| -53.16 | -20.68 | 7.13   | 3 | 3    | STG.L    |
| 58.15  | -21.78 | 6.8    | 3 | 4    | STG.R    |
| -39.88 | 15.14  | -20.18 | 6 | 2    | TPOsup.L |
| 48.25  | 14.75  | -16.86 | 6 | 3.25 | TPOsup.R |
| -55.52 | -33.8  | -2.2   | 3 | 3.5  | MTG.L    |
| 57.47  | -37.23 | -1.47  | 3 | 1.75 | MTG.R    |
| -36.32 | 14.59  | -34.08 | 6 | 3.5  | TPOmid.L |
| 44.22  | 14.55  | -32.23 | 6 | 2.25 | TPOmid.R |
| -49.77 | -28.05 | -23.17 | 3 | 1.5  | ITG.L    |
| 53.69  | -31.07 | -22.32 | 3 | 1.25 | ITG.R    |

For the young adulthood

|        |        |        |   |      |             |
|--------|--------|--------|---|------|-------------|
| -38.65 | -5.68  | 50.94  | 1 | 3.75 | PreCG.L     |
| 41.37  | -8.21  | 52.09  | 1 | 3.25 | PreCG.R     |
| -18.45 | 34.81  | 42.2   | 2 | 3    | SFGdor.L    |
| 21.9   | 31.12  | 43.82  | 2 | 2.75 | SFGdor.R    |
| -16.56 | 47.32  | -13.31 | 2 | 3.25 | ORBsup.L    |
| 18.49  | 48.1   | -14.02 | 2 | 2.5  | ORBsup.R    |
| -33.43 | 32.73  | 35.46  | 2 | 2.5  | MFG.L       |
| 37.59  | 33.06  | 34.04  | 2 | 2.5  | MFG.R       |
| -30.65 | 50.43  | -9.62  | 2 | 3.25 | ORBmid.L    |
| 33.18  | 52.59  | -10.73 | 2 | 4    | ORBmid.R    |
| -48.43 | 12.73  | 19.02  | 2 | 2    | IFGoperc.L  |
| 50.2   | 14.98  | 21.41  | 2 | 2.5  | IFGoperc.R  |
| -45.58 | 29.91  | 13.99  | 2 | 2.25 | IFGtriang.L |
| 50.33  | 30.16  | 14.17  | 2 | 2.5  | IFGtriang.R |
| -35.98 | 30.71  | -12.11 | 2 | 4.75 | ORBinf.L    |
| 41.22  | 32.23  | -11.91 | 2 | 4    | ORBinf.R    |
| -47.16 | -8.48  | 13.95  | 1 | 4.5  | ROL.L       |
| 52.65  | -6.25  | 14.63  | 1 | 4.25 | ROL.R       |
| -5.32  | 4.85   | 61.38  | 2 | 2    | SMA.L       |
| 8.62   | 0.17   | 61.85  | 2 | 5    | SMA.R       |
| -8.06  | 15.05  | -11.46 | 2 | 5    | OLF.L       |
| 10.43  | 15.91  | -11.26 | 2 | 5.5  | OLF.R       |
| -4.8   | 49.17  | 30.89  | 2 | 3.75 | SFGmed.L    |
| 9.1    | 50.84  | 30.22  | 2 | 4    | SFGmed.R    |
| -5.17  | 54.06  | -7.4   | 2 | 5.25 | ORBsupmed.L |
| 8.16   | 51.67  | -7.13  | 2 | 5    | ORBsupmed.R |
| -5.08  | 37.07  | -18.14 | 2 | 3.25 | REC.L       |
| 8.35   | 35.64  | -18.04 | 2 | 3    | REC.R       |
| -35.13 | 6.65   | 3.44   | 7 | 4.5  | INS.L       |
| 39.02  | 6.25   | 2.08   | 7 | 5.5  | INS.R       |
| -4.04  | 35.4   | 13.95  | 6 | 3.5  | ACG.L       |
| 8.46   | 37.01  | 15.84  | 6 | 3    | ACG.R       |
| -5.48  | -14.92 | 41.57  | 6 | 3.25 | DCG.L       |
| 8.02   | -8.83  | 39.79  | 6 | 3.75 | DCG.R       |
| -4.85  | -42.92 | 24.67  | 6 | 3.25 | PCG.L       |
| 7.44   | -41.81 | 21.87  | 6 | 2.25 | PCG.R       |
| -25.03 | -20.74 | -10.13 | 6 | 2.75 | HIP.L       |
| 29.23  | -19.78 | -10.33 | 6 | 3    | HIP.R       |
| -21.17 | -15.95 | -20.7  | 6 | 4    | PHG.L       |
| 25.38  | -15.15 | -20.47 | 6 | 3.25 | PHG.R       |
| -23.27 | -0.67  | -17.14 | 7 | 3    | AMYG.L      |
| 27.32  | 0.64   | -17.5  | 7 | 3.5  | AMYG.R      |
| -7.14  | -78.67 | 6.44   | 5 | 2.75 | CAL.L       |

|        |        |        |   |      |          |
|--------|--------|--------|---|------|----------|
| 15.99  | -73.15 | 9.4    | 5 | 2.75 | CAL.R    |
| -5.93  | -80.13 | 27.22  | 5 | 2.75 | CUN.L    |
| 13.51  | -79.36 | 28.23  | 5 | 3    | CUN.R    |
| -14.62 | -67.56 | -4.63  | 5 | 3.25 | LING.L   |
| 16.29  | -66.93 | -3.87  | 5 | 3.25 | LING.R   |
| -16.54 | -84.26 | 28.17  | 5 | 3.75 | SOG.L    |
| 24.29  | -80.85 | 30.59  | 5 | 3.75 | SOG.R    |
| -32.39 | -80.73 | 16.11  | 5 | 3.75 | MOG.L    |
| 37.39  | -79.7  | 19.42  | 5 | 3.75 | MOG.R    |
| -36.36 | -78.29 | -7.84  | 5 | 3    | IOG.L    |
| 38.16  | -81.99 | -7.61  | 5 | 2.5  | IOG.R    |
| -31.16 | -40.3  | -20.23 | 5 | 4.25 | FFG.L    |
| 33.97  | -39.1  | -20.18 | 5 | 3.75 | FFG.R    |
| -42.46 | -22.63 | 48.92  | 1 | 3.5  | PoCG.L   |
| 41.43  | -25.49 | 52.55  | 1 | 3.75 | PoCG.R   |
| -23.45 | -59.56 | 58.96  | 4 | 2.5  | SPG.L    |
| 26.11  | -59.18 | 62.06  | 4 | 3    | SPG.R    |
| -42.8  | -45.82 | 46.74  | 4 | 3    | IPL.L    |
| 46.46  | -46.29 | 49.54  | 4 | 2.25 | IPL.R    |
| -55.79 | -33.64 | 30.45  | 4 | 4.25 | SMG.L    |
| 57.61  | -31.5  | 34.48  | 4 | 4.5  | SMG.R    |
| -44.14 | -60.82 | 35.59  | 4 | 3.5  | ANG.L    |
| 45.51  | -59.98 | 38.63  | 4 | 3    | ANG.R    |
| -7.24  | -56.07 | 48.01  | 4 | 1.5  | PCUN.L   |
| 9.98   | -56.05 | 43.77  | 4 | 2    | PCUN.R   |
| -7.63  | -25.36 | 70.07  | 2 | 1.75 | PCL.L    |
| 7.48   | -31.59 | 68.09  | 2 | 1.5  | PCL.R    |
| -11.46 | 11     | 9.24   | 7 | 2.75 | CAU.L    |
| 14.84  | 12.07  | 9.42   | 7 | 2.75 | CAU.R    |
| -23.91 | 3.86   | 2.4    | 7 | 3.5  | PUT.L    |
| 27.78  | 4.91   | 2.46   | 7 | 4.5  | PUT.R    |
| -17.75 | -0.03  | 0.21   | 7 | 2    | PAL.L    |
| 21.2   | 0.18   | 0.23   | 7 | 3.25 | PAL.R    |
| -10.85 | -17.56 | 7.98   | 7 | 2.25 | THA.L    |
| 13     | -17.55 | 8.09   | 7 | 2    | THA.R    |
| -41.99 | -18.88 | 9.98   | 3 | 3    | HES.L    |
| 45.86  | -17.15 | 10.41  | 3 | 2.25 | HES.R    |
| -53.16 | -20.68 | 7.13   | 3 | 4    | STG.L    |
| 58.15  | -21.78 | 6.8    | 3 | 4.75 | STG.R    |
| -39.88 | 15.14  | -20.18 | 6 | 4    | TPOsup.L |
| 48.25  | 14.75  | -16.86 | 6 | 4.5  | TPOsup.R |
| -55.52 | -33.8  | -2.2   | 3 | 3.25 | MTG.L    |
| 57.47  | -37.23 | -1.47  | 3 | 2    | MTG.R    |

|        |        |        |   |      |          |
|--------|--------|--------|---|------|----------|
| -36.32 | 14.59  | -34.08 | 6 | 4.5  | TPOmid.L |
| 44.22  | 14.55  | -32.23 | 6 | 5    | TPOmid.R |
| -49.77 | -28.05 | -23.17 | 3 | 3.75 | ITG.L    |
| 53.69  | -31.07 | -22.32 | 3 | 2    | ITG.R    |

**Table S3. Functional connectivity within anatomically distinct brain areas with other five groups**

| Connectivity density         | Central regions (I) | Frontal lobe (II) | Tempora l lobe (III) | Parietal lobe (IV) | Occipita l lobe (V) | Limbic lobe (VI) | Insula/Sub cortical gray nuclei (VII) |
|------------------------------|---------------------|-------------------|----------------------|--------------------|---------------------|------------------|---------------------------------------|
| Leiden Part1                 | 0.05; 0.01;         | 0.05; 0.01;       | 0.05; 0.01;          | 0.05; 0.01;        | 0.05; 0.01;         | 0.05;            | 0.05; 0.01;                           |
| Leiden Part2                 | 0.05; 0.01;         | -                 | 0.05; 0.01;          | 0.05; 0.01;        | 0.05; 0.01;         |                  | 0.05; 0.01;                           |
| Zang Part1                   | 0.05; 0.01;         | -                 | 0.05; 0.01;          | 0.05; 0.01;        | 0.05; 0.01;         | 0.05; 0.01;      | 0.05; 0.01;                           |
| Zang Part2                   | 0.05; 0.01;         | -                 | 0.05; 0.01;          | 0.05; 0.01;        | 0.05; 0.01;         | 0.05; 0.01;      | 0.05; 0.01;                           |
| Zang Part3                   | 0.05; 0.01;         | -                 | 0.05; 0.01;          | 0.05; 0.01;        | 0.05; 0.01;         | 0.05; 0.01;      | 0.05; 0.01;                           |
| Zang Part5                   | 0.05; 0.01;         | -                 | 0.05; 0.01;          | 0.05; 0.01;        | 0.05; 0.01;         | 0.05; 0.01;      | 0.05; 0.01;                           |
| <b>Connectivity strength</b> |                     |                   |                      |                    |                     |                  |                                       |
| Leiden Part1                 | -                   | -                 | 0.05                 | -                  | 0.05; 0.01;         | -                | -                                     |
| Leiden Part2                 | -                   | -                 | 0.05; 0.01;          | -                  | 0.05; 0.01;         | 0.05             | -                                     |
| Zang Part1                   | -                   | -                 | 0.05; 0.01;          | -                  | 0.05;               | -                | 0.05; 0.01;                           |
| Zang Part2                   | -                   | -                 | 0.05; 0.01;          | -                  | 0.05; 0.01;         | 0.05             | 0.05; 0.01;                           |
| Zang Part3                   | -                   | -                 | 0.05; 0.01;          | -                  | 0.05; 0.01;         | 0.05             | 0.05; 0.01;                           |
| Zang Part5                   | -                   | -                 | 0.05; 0.01;          | -                  | 0.05; 0.01;         | -                | 0.05; 0.01;                           |

The value in the table is P value.
